# Supplementary material for: Refined Energy Device–Free Submucosal Hemorrhoidectomy: Eliminating Postoperative Urinary Retention and Minimizing Tissue Injury
Source: Research Square preprint supplement (doi:10.21203/rs.3.rs-7942207/v1), 2025-11-26
Supplement: Supplementary file 1 [file 7a8edf94dac369702dbf12c0.docx]

# STROBE Statement—Checklist for Reporting Observational Studies

Title of the manuscript: Refined Energy Device–Free Submucosal Hemorrhoidectomy: Eliminating Postoperative Urinary Retention and Minimizing Tissue Injury

Study design: Retrospective descriptive study

Journal: BMC Surgery

| Item No. | STROBE Item | Recommendation | Location in Manuscript |
| --- | --- | --- | --- |
| 1a | Indicate the study’s design with a commonly used term in the title or abstract. | Title and Abstract identify it as a retrospective descriptive study. | Title, Abstract |
| 1b | Provide an informative and balanced summary of what was done and what was found. | Structured abstract summarizing background, purpose, methods, results, and conclusions. | Abstract |
| 2 | Background/rationale: Explain the scientific background and rationale for the investigation being reported. | Discusses limitations of current hemorrhoidectomy and rationale for refinement. | Introduction |
| 3 | Objectives: State specific objectives, including any prespecified hypotheses. | States aim to evaluate refined energy device–free submucosal hemorrhoidectomy and its outcomes. | Abstract; Introduction |
| 4 | Study design: Present key elements of study design early in the paper. | Retrospective descriptive study stated in Abstract and Methods. | Abstract; Methods 2.1 |
| 5 | Setting: Describe the setting, locations, and relevant dates, including periods of recruitment and data collection. | Lin Kou Chang Gung Memorial Hospital, Taiwan; October 2022–May 2024. | Methods 2.1 |
| 6a | Participants: Give eligibility criteria, sources, and methods of selection of participants. | Consecutive patients with symptomatic hemorrhoidal disease treated during study period. | Methods 2.1 |
| 7 | Variables: Clearly define outcomes, exposures, predictors, and potential confounders. | Primary variables: postoperative urinary retention, pain, complications, hospital stay; secondary: bleeding, abscess, fissure. | Methods 2.1–2.4 |
| 8 | Data sources/measurement: For each variable of interest, give sources of data and assessment methods. | Clinical data extracted from medical records and follow-up visits; pain measured by NRS. | Methods 2.1, 2.4 |
| 9 | Bias: Describe efforts to address potential sources of bias. | Standardized surgical technique and single-center consistency minimize variability. | Methods 2.2, Discussion |
| 10 | Study size: Explain how the study size was arrived at. | Included all consecutive cases meeting criteria during time period (n=110). | Methods 2.1 |
| 11 | Quantitative variables: Explain how quantitative variables were handled in analyses. | Descriptive statistics reported (means, proportions); no comparative tests. | Methods 2.1, Results |
| 12a | Statistical methods: Describe all statistical methods, including those used to summarize data. | Descriptive analysis of outcomes and complication rates. | Methods 2.1 |
| 13a | Participants: Report numbers at each stage of study. | Total 110 patients included; follow-up details provided. | Results |
| 13b | Reasons for non-participation at each stage. | Not applicable (all consecutive eligible patients included). | – |
| 14a | Descriptive data: Characteristics of study participants (e.g., demographics, clinical). | Table 1 and text describe age, sex, hemorrhoid grade, setting. | Results, Table 1 |
| 14b | Indicate number of participants with missing data for each variable. | Not specifically applicable; complete records available. | Results |
| 15 | Outcome data: Report numbers of outcome events or summary measures. | Postoperative complications, pain, urinary retention, and analgesic use detailed. | Results, Table 2, Table 3 |
| 16 | Main results: Summarize key results with reference to study objectives. | Discussion opening paragraph and conclusion restate key findings. | Discussion |
| 17 | Limitations: Discuss limitations of the study, taking into account potential bias or imprecision. | Addresses sample size, retrospective design, and short-term follow-up. | Section 5. Limitations |
| 18 | Interpretation: Give a cautious overall interpretation considering objectives and results. | Discusses alignment with minimally invasive principles and reduced complications. | Discussion |
| 19 | Generalizability: Discuss the generalizability (external validity) of the study results. | Notes limited sample and single-center design; suggests further validation. | Limitations section |
| 20 | Funding: Give source of funding and role of funders. | No funding received. | Funding section |
| 21 | Ethics approval: Include ethical approval details. | IRB approval provided (No. 202400418B0). | Methods 2.1; Declarations |
| 22 | Data availability: Statement on data sharing. | Data available upon reasonable request. | Declarations |
